# Supplementary material for: Does the Age Affect the Outcomes of Cardiac Resynchronization Therapy in Elderly Patients?
Source: MDPI journal article supplement (doi:10.3390/jcm10071451), 2021-04-01
Supplement: s1 [file s1]

Supplementary table 1. Outcomes in CRTD vs CRTP patients in the three groups

| At 1-year follow-up examination    | All pts (n=934) | All pts CRT-D (n=820) | All pts CRT-P (n=114) | Age <65 (n=242) (A) | Age <65 CRT-D (n=231) (A1) | Age <65 CRT-P (n=11) (A2) | Age 65-74 (n=347) (B) | Age 65-74 CRT-D (n=321) (B1) | Age 65-74 CRT-P (n=26) (B2) | Age ≥75 (n=345) (C) | Age ≥75 CRT-D (n=268) (C1) | Age ≥75 CRT-P (n=77) (C2) |
|------------------------------------|-----------------|-----------------------|-----------------------|---------------------|----------------------------|---------------------------|-----------------------|------------------------------|-----------------------------|---------------------|----------------------------|---------------------------|
| Overall Death, n (%)               | 47 (5.0)        | 40 (4.9)              | 7 (6.1)               | 4 (1.7)             | 4 (1.7)                    | 0 (0.0)                   | 9 (2.6)               | 9 (2.8)                      | 0 (0.0)                     | 34 (9.9)            | 27 (10.1)                  | 7 (9.1)                   |
| HF Hospitalization, n (%)          | 67 (7.2)        | 61 (7.4)              | 6 (5.3)               | 10 (4.1)            | 10 (4.3)                   | 0 (0.0)                   | 33 (9.5)              | 30 (9.3)                     | 3 (11.5)                    | 24 (7.0)            | 21 (7.8)                   | 3 (3.9)                   |
| Death or HF Hospitalization, n (%) | 108 (11.6)      | 95 (11.6)             | 13 (11.4)             | 14 (5.8)            | 14 (6.1)                   | 0 (0.0)                   | 40 (11.5)             | 37 (11.5)                    | 3 (11.5)                    | 54 (15.7)           | 44 (16.4)                  | 10 (13.0)                 |
