# Supplementary figures and images for: Does the Age Affect the Outcomes of Cardiac Resynchronization Therapy in Elderly Patients?
Source: MDPI journal article supplement (doi:10.3390/jcm10071451), 2021-04-01

Supplementary figure 1. Kaplan-Meier curves of CRTD vs CRTP patients.

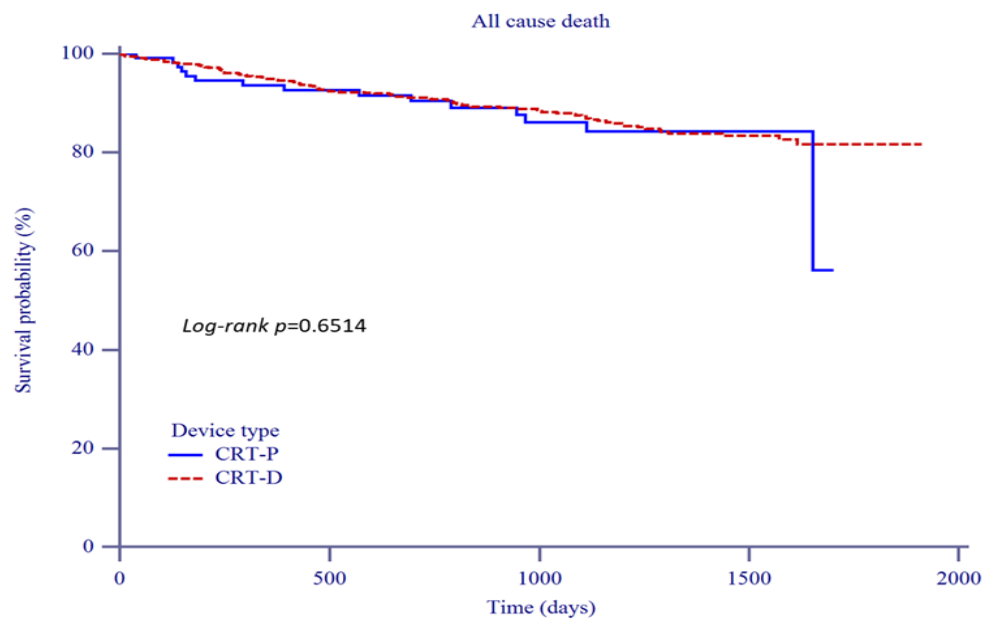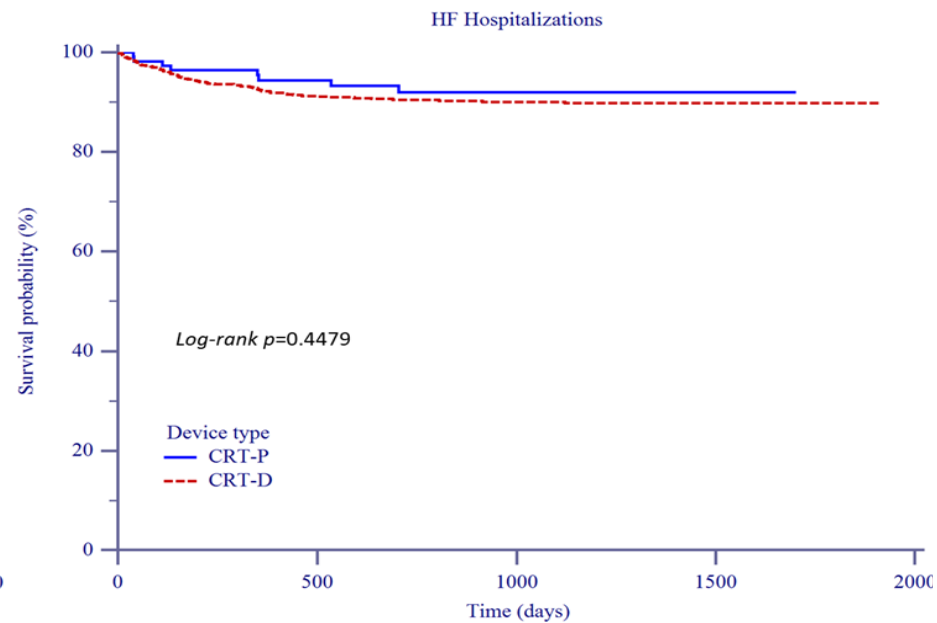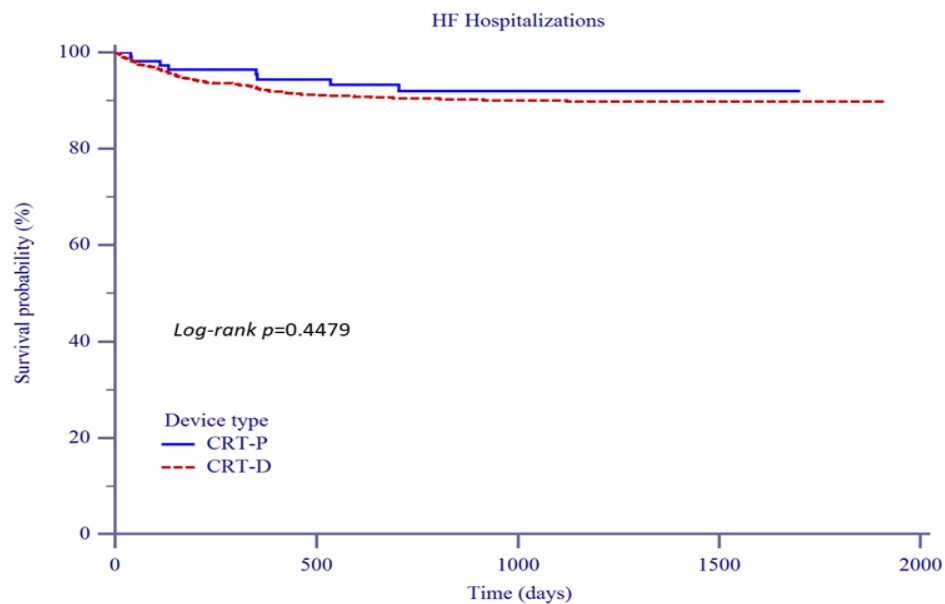

Supplement: s1 [file s1]
